# Supplementary material
Source: publisher figshare collection journal article supplement (https://acs.figshare.com/ndownloader/files/17485655)
Supplement: Supplementary file 1 [file 17485655]

## Supporting Information

# Red Blood Cell (RBC) Membrane Coated Poly(lactic-co-glycolic acid) Nanoparticles for Enhanced Chemo and Hypoxia Activated Therapy

*Anil Parsram Bidkar,<sup>a</sup> Pallab Sanpui,<sup>b</sup> and Siddhartha Sankar Ghosh<sup>a,c,\*</sup>*

<sup>a</sup> Department of Biosciences & Bioengineering, Indian Institute of Technology Guwahati, Guwahati 39, Assam, India

<sup>b</sup>Department of Biotechnology, BITS Pilani, Dubai Campus, Dubai International Academic City, P.O. Box No. – 345055, Dubai, UAE,

<sup>c</sup>Centre for Nanotechnology, Indian Institute of Technology Guwahati, Guwahati-39, Assam, India

\*Corresponding author phone: +0361-258-2206; Fax: +0361-258-2249

Email: SSG: [sghosh@iitg.ernet.in](mailto:sghosh@iitg.ernet.in)

Table S1: Nucleotide sequences of the primers used to study gene expression.

| Gene        | Forward Primer (5' to 3') | Reverse Primer (5' to 3') |
|-------------|---------------------------|---------------------------|
| GAPDH       | GAAATCCCATCACCATCTTCCAGG  | GAGCCCCAGCCTTCTCCATG      |
| Vimentin    | AGTCCACTGAGTACCGGAGAC     | CATTTCACGCATCTGGCGTTC     |
| Fibronectin | GGTGACACTTATGAGCGTCCTAAA  | AACATGTAACCACCAGTCTCATGTG |
| IL1 $\beta$ | CAGAAGTACCTGAGCTCGCC      | AGATTCTAGCTGGATGCCG       |
| IL6         | GGCACTGGCAGAAAACAACC      | GCAAGTCTCCTCATTGAATCC     |
| IL8         | CAAGAGCCAGGAAGAAACCA      | GTCCACTCTCAATCACTCTCAG    |

**Table S2.** Loading and encapsulation efficeincy of the curcumin and tirapazamine seperately or in combination with TPZ in PLGA NPs.

|                          | <i>(Drug:PLGA) ratio</i> | <i>Encapsulation Efficiency (%)</i> | <i>Loading Efficiency (%)</i> |
|--------------------------|--------------------------|-------------------------------------|-------------------------------|
| <i>Cur</i>               | 0.25                     | 80 $\pm$ 2.1                        | 20 $\pm$ 0.5                  |
|                          | 0.5                      | 68 $\pm$ 1.8                        | 34 $\pm$ 0.9                  |
| <i>TPZ</i>               | 0.25                     | 72 $\pm$ 2.3                        | 18 $\pm$ 1.1                  |
|                          | 0.5                      | 58 $\pm$ 3.2                        | 29 $\pm$ 1.2                  |
| <i>TPZ in Cur+TPZ@PL</i> | 0.125                    | 64 $\pm$ 2.8                        | 8 $\pm$ 0.6                   |
|                          | 0.25                     | 25.2 $\pm$ 1.6                      | 6.3 $\pm$ 0.3                 |
| <i>Cur in Cur+TPZ@PL</i> | 0.125                    | 56.8 $\pm$ 3.2                      | 11 $\pm$ 1.2                  |
|                          | 0.25                     | 61.2 $\pm$ 3.6                      | 15.3 $\pm$ 0.9                |

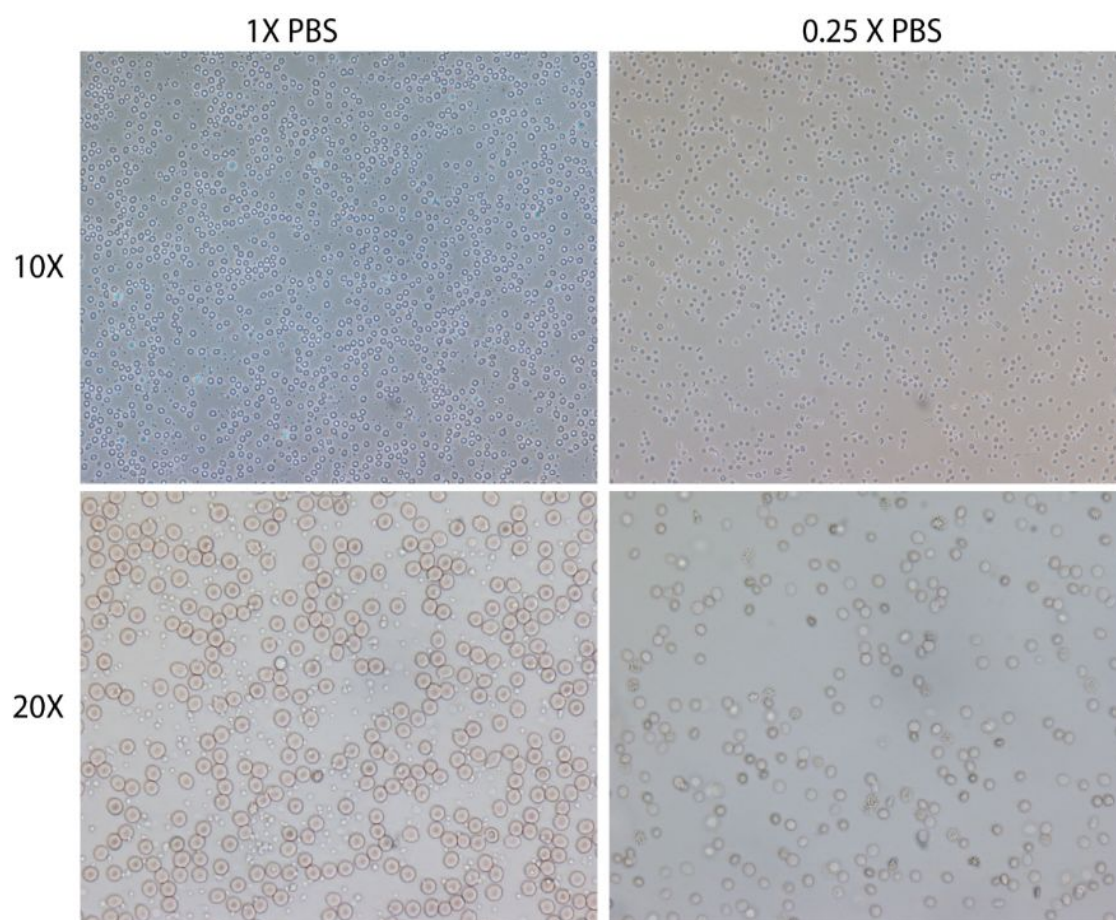

**Figure S1.** Microscopic images of RBCs in 1X PBS and 0.25X PBS, RBCs in 0.25X showed loss in the membrane integrity due to hypotonic treatment.

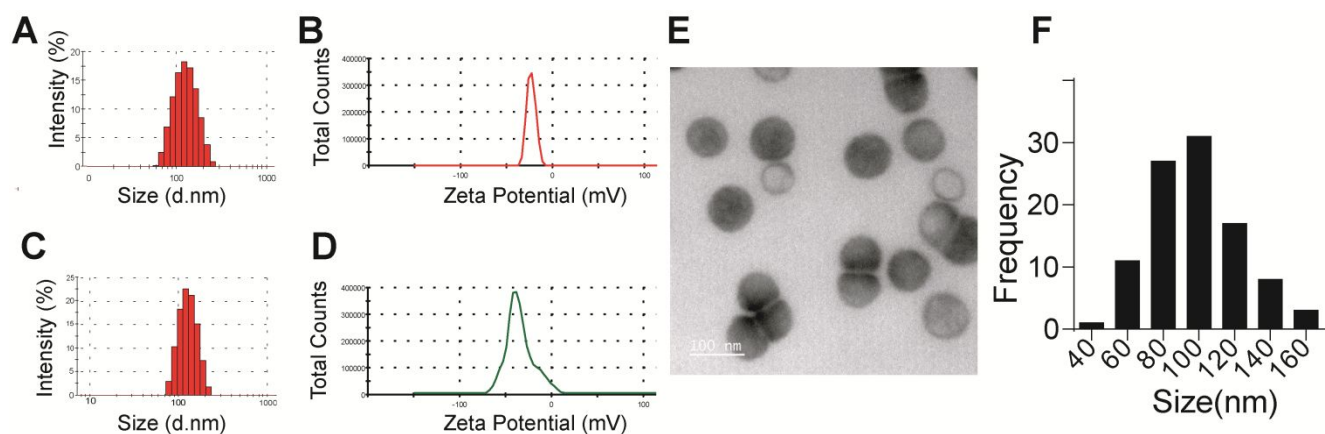

**Figure S2.** Characterization of PLGA NPs and RBC-NPs. (A-D) Hydrodynamic diameter of the PLGA NPs (A) and RBC-NPs (C) along with zeta potential of PLGA NPs (B) and RBC-NPs (D). (E) TEM micrograph for PLGA NPs. (F) Size distribution of the RBC-NPs calculated from TEM images.

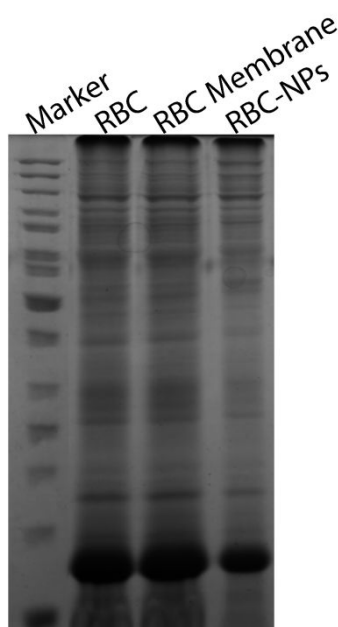

**Figure S3.** SDS-PAGE of the RBC membrane proteins. RBC, isolated RBC membrane and RBC-NPs showed similar protein content confirming the coating of PLGA NPs without loss of the membrane proteins.

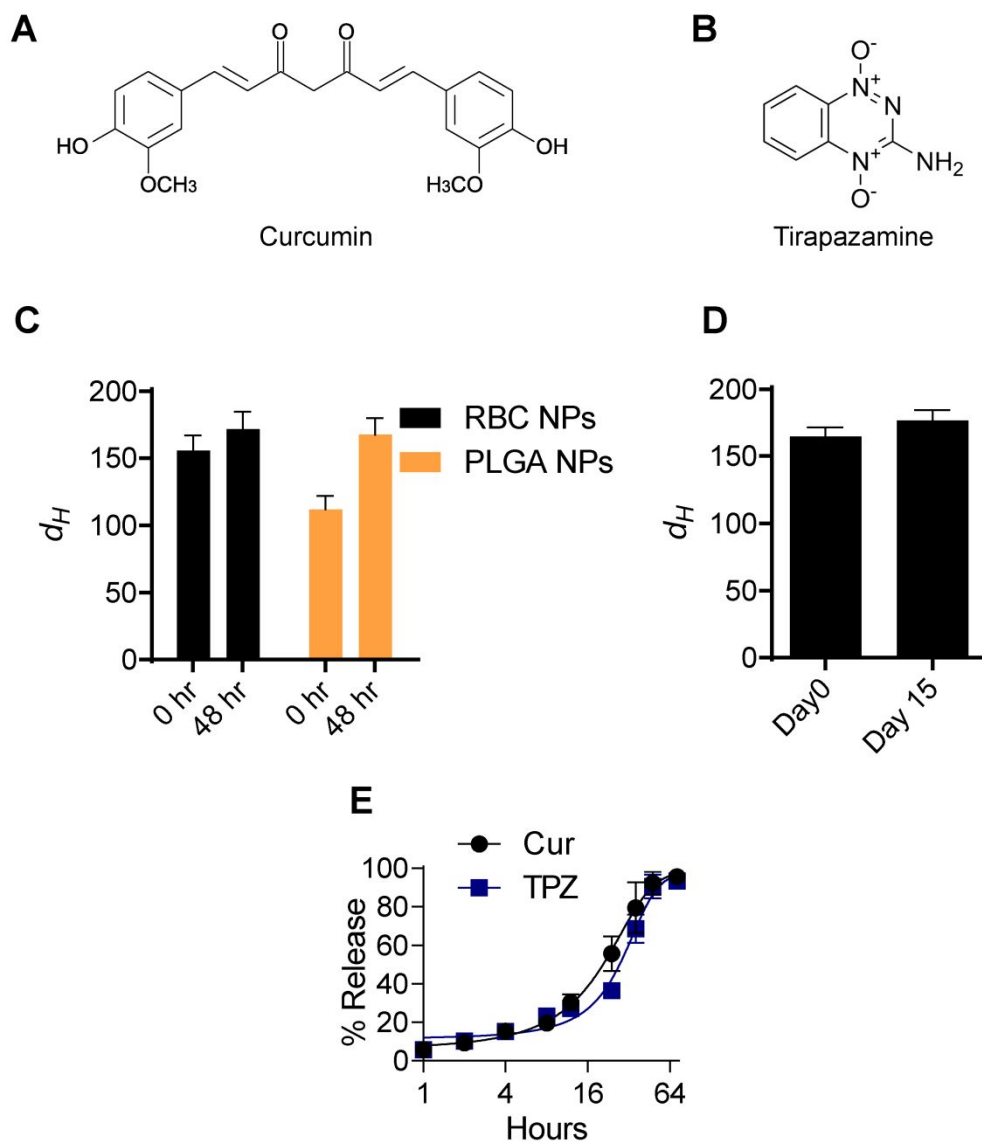

**Figure S4 (A, B)** Chemical structure of the curcumin and tirapazamine. **(C)** Size of the PLGA NPs and RBC NPs when stored at 37 °C in FBS for 48 hr. **(D)** Hydrodynamic diameter measured at day 0 and day 15 after storage at -80 °C. **(E)** Release profile of Cur and TPZ from Cur+TPZ@RB NPs.

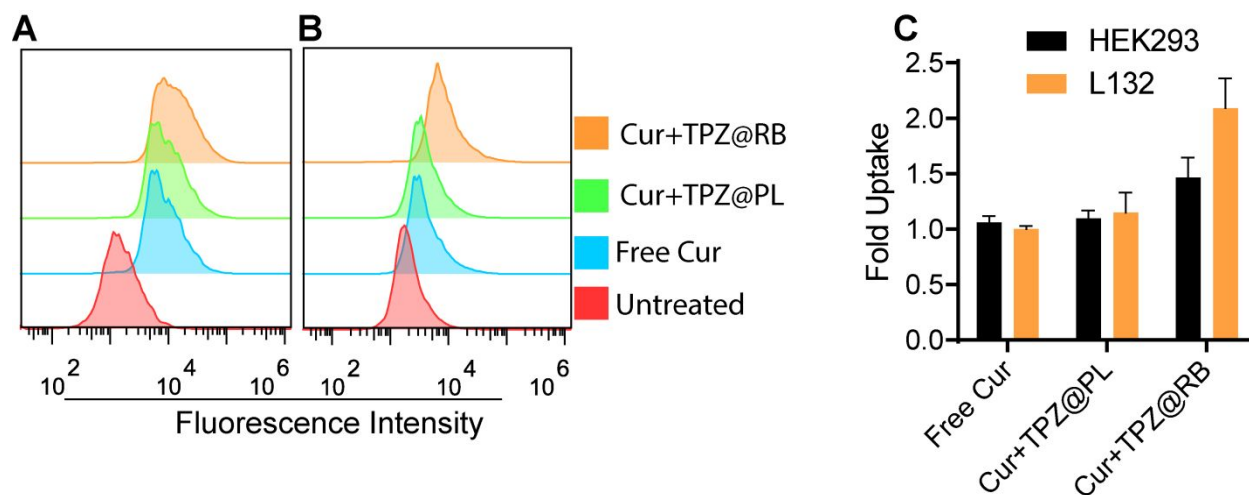

**Figure S5.** Uptake of the Cur, Cur+TPZ@PL and Cur+TPZ@RB in HEK293 (A) and L132 (B) cells. (C) Comparison of the uptake of Cur, Cur+TPZ@PL and Cur+TPZ@RB.

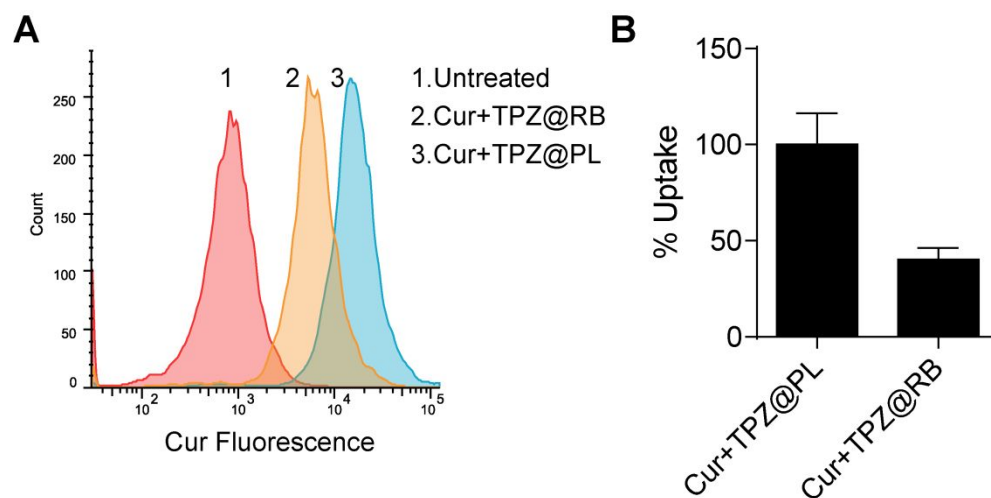

**Figure S6.** Uptake study showing histograms (A) of the Cur+TPZ@PL and Cur+TPZ@RB uptake in macrophage cells. (B) % Uptake of the Cur+TPZ@RB NPs as compared to Cur+TPZ@PL.

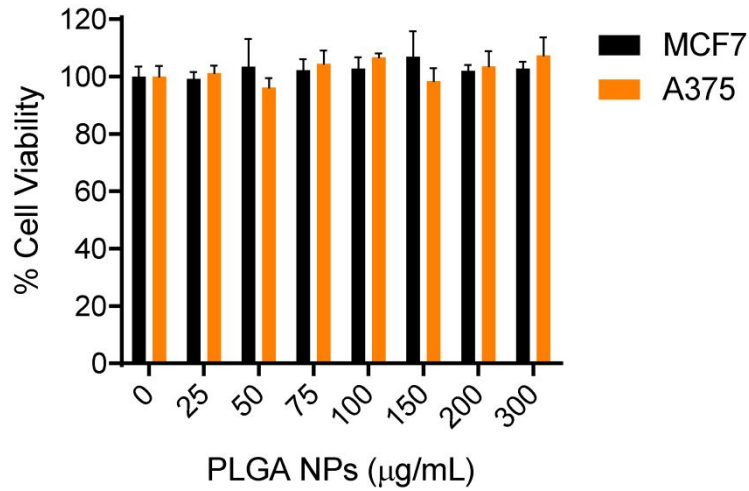

**Figure S7.** Toxicity of the PLGA nanoparticles was studied in MCF7 and A375 cells for 48 h treatment.

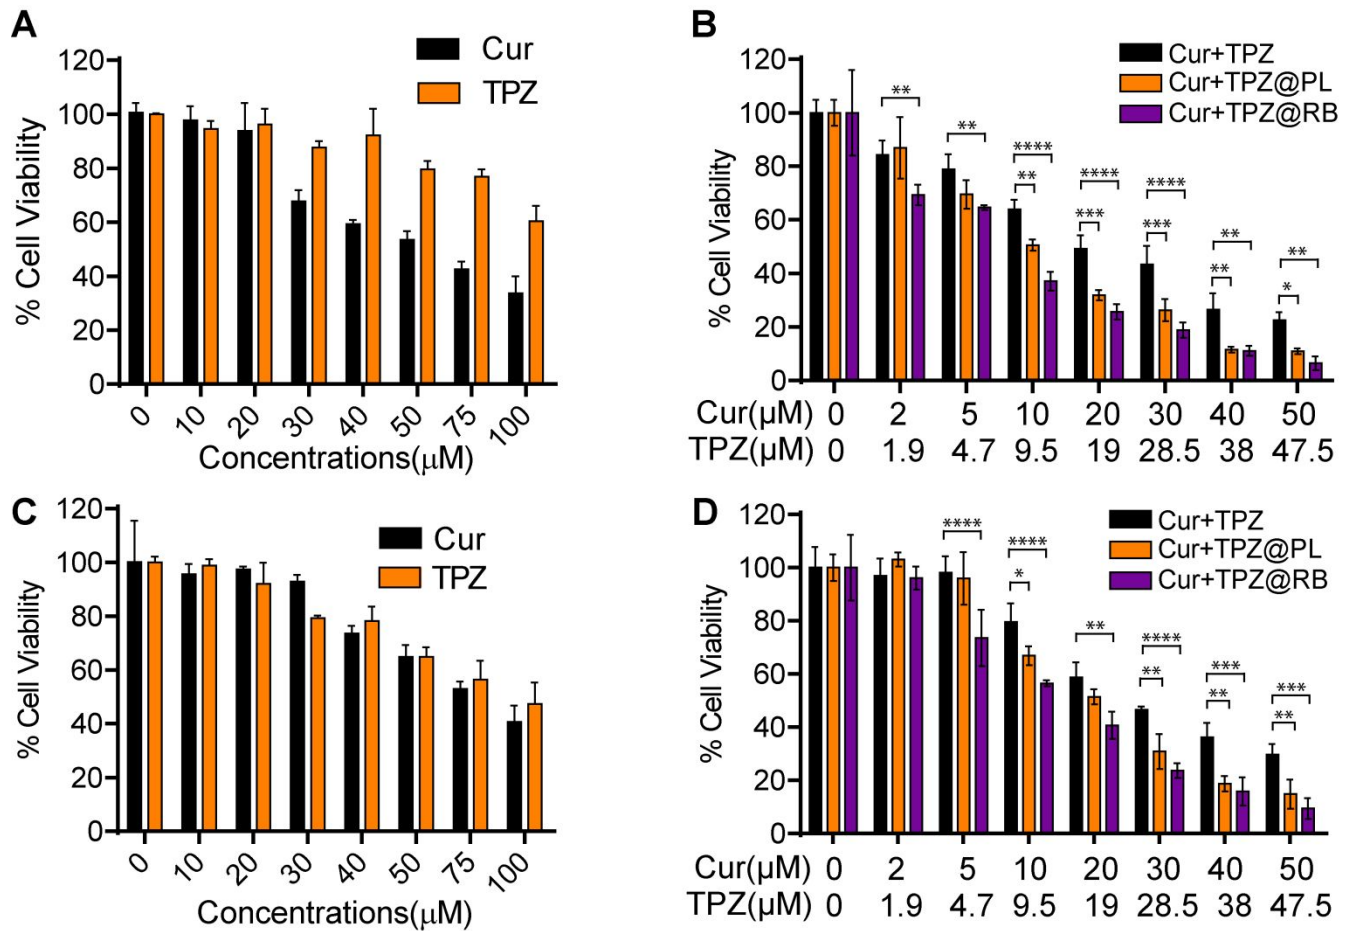

**Figure S8.** Antiproliferative assays of the Cur, TPZ and their formulations. **(A)** MTT assay results of Cur and TPZ in MCF7 cells. **(B)** MTT assay results on MCF7 cells for Cur+TPZ, Cur+TPZ@PL and Cur+TPZ@RB. **(C)** MTT assay results of Cur and TPZ treatment in A375 cells. **(D)** MTT assay results on A375 cells for Cur+TPZ, Cur+TPZ in PLGA NPs and RBC NPs. (Data are shown as mean  $\pm$  SD,  $n = 3$ ;  $p < 0.05$ ,  $p < 0.01$ ,  $p < 0.001$  and  $p < 0.00001$  are denoted as \*, \*\*, \*\*\*, and \*\*\*\* respectively).

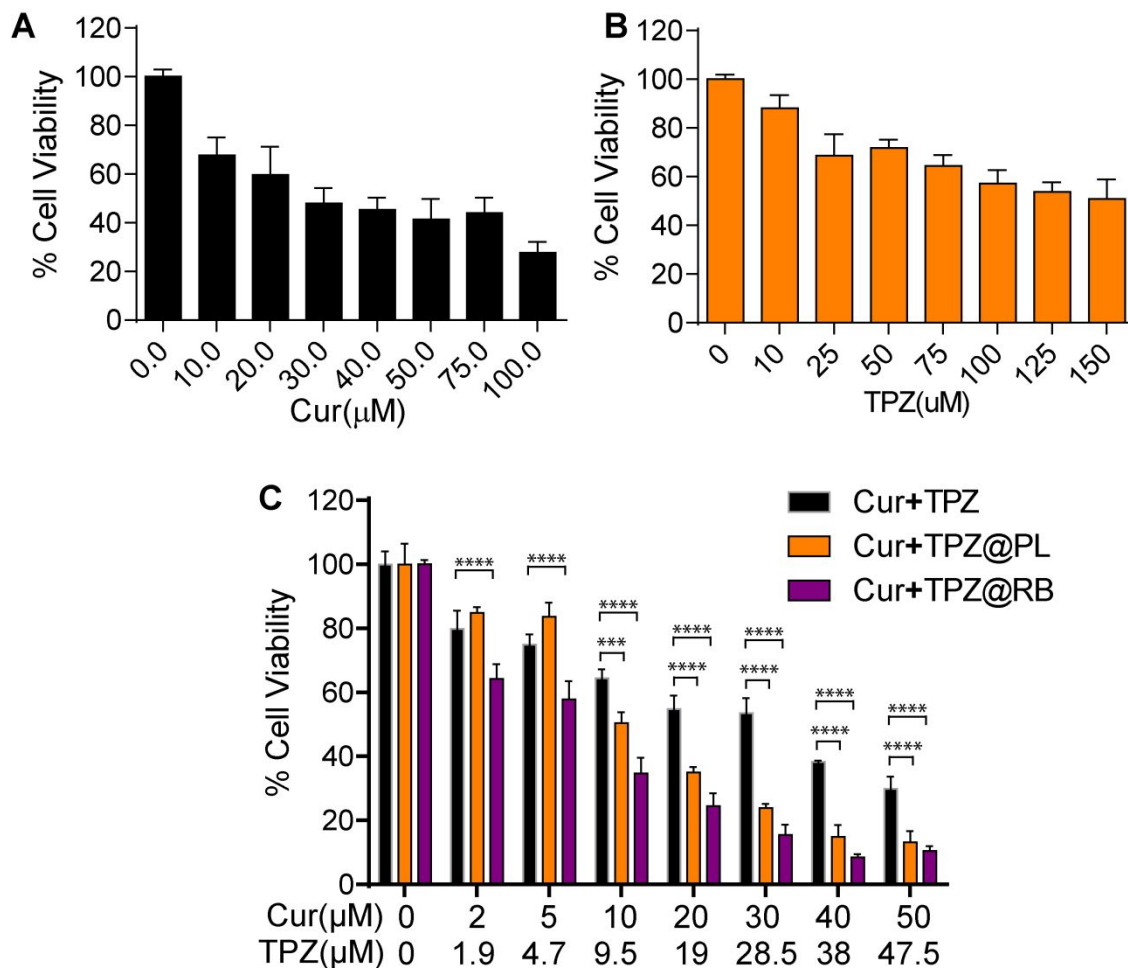

**Figure S9 (A, B)** MTT assay results of Cur and TPZ in HEK293 cells. **C:** MTT assay results on HEK293 cells for Cur+TPZ, Cur+TPZ@PL and Cur+TPZ@RB. (Data are shown as mean  $\pm$  SD,  $n = 3$ ;  $p < 0.05$ ,  $p < 0.01$ ,  $p < 0.001$  and  $p < 0.00001$  are denoted as \*, \*\*, \*\*\*, and \*\*\*\* respectively).



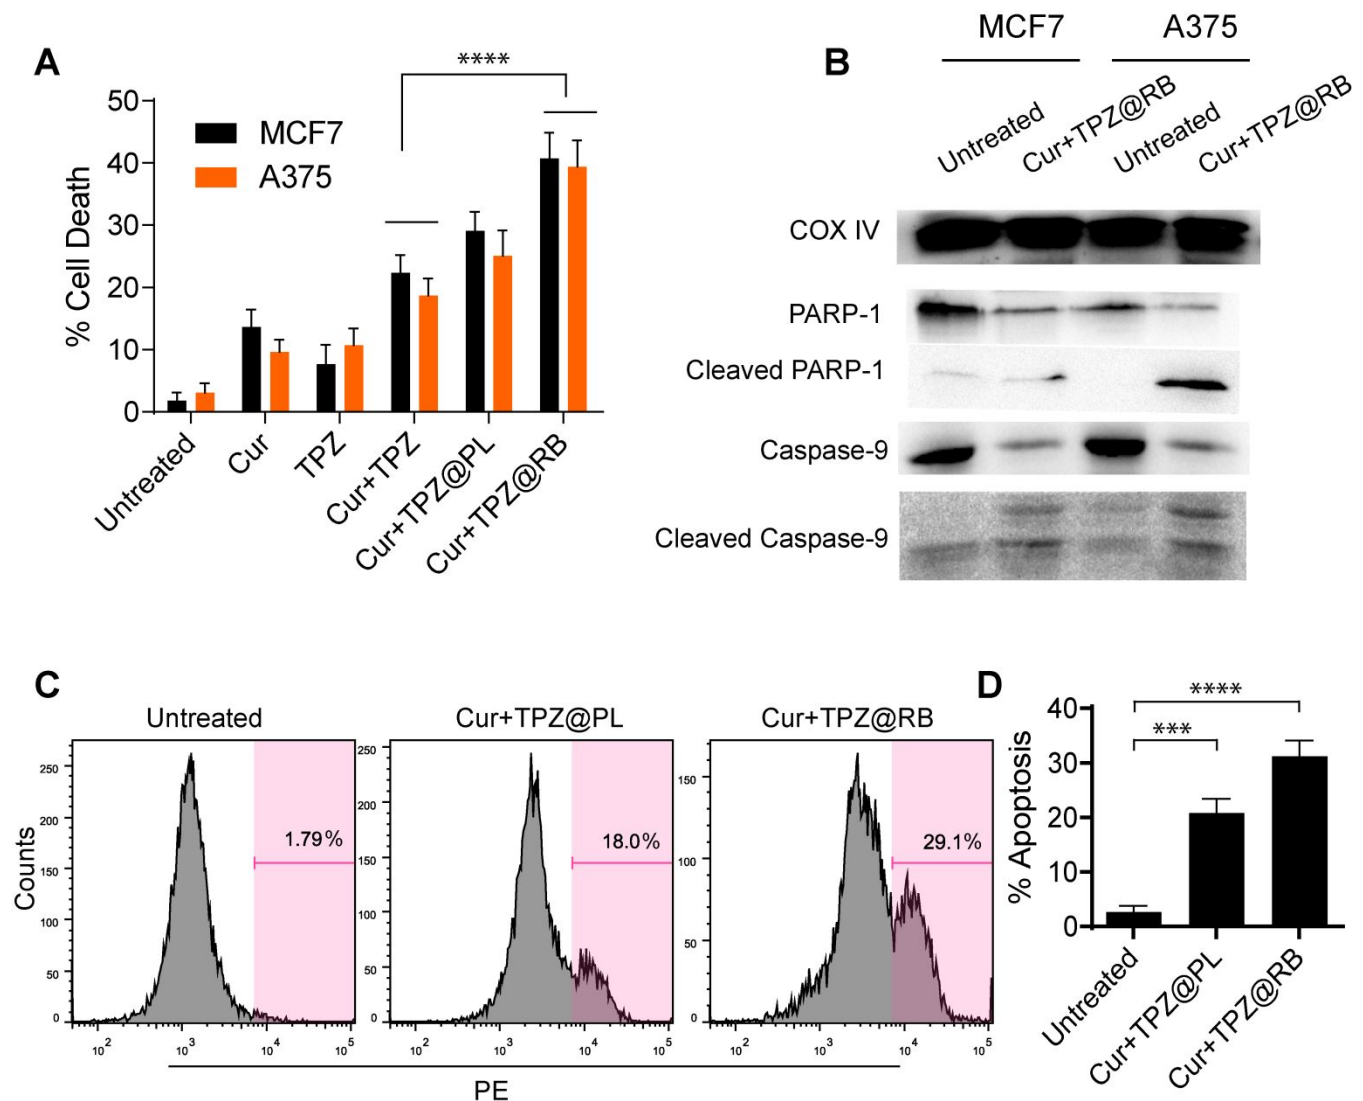

**Figure S10.** Apoptosis and cell death measurements. **(A)** Measurements of % cell death in treated MCF7 and A375 cells by flow cytometry. **(B)** Western blots showing cleaved PARP-1 and cleaved caspase-9 after treatment in MCF7 and A375 cells. **(C, D)** Caspase-3 assay results showing number of apoptotic cells positive for active caspase-3. (Data are shown as mean  $\pm$  SD,  $n = 3$ ;  $p < 0.001$  and  $p < 0.00001$  are denoted as \*\*\* and \*\*\*\*, respectively).

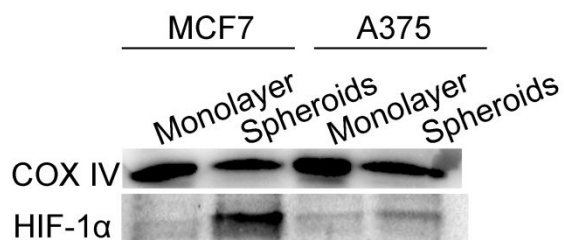

**Figure S11.** Western blot for detection of the HIF-1 $\alpha$  protein in MCF7 and A375 spheroids.

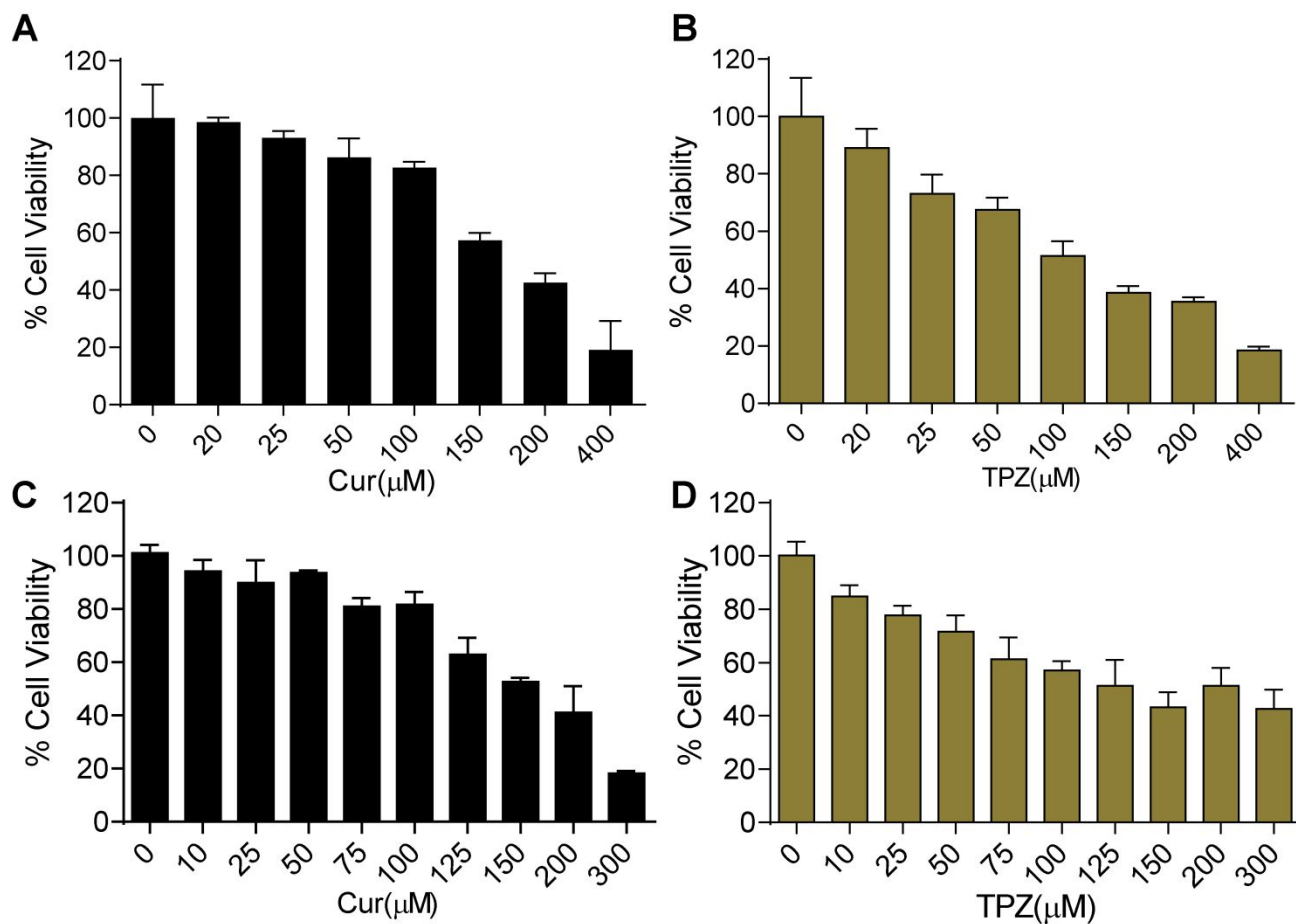

**Figure S12.** Viability assay results after treatment with increasing concentrations of Cur and TPZ on MCF7 (A, B) and A375 (C, D) Spheroids.

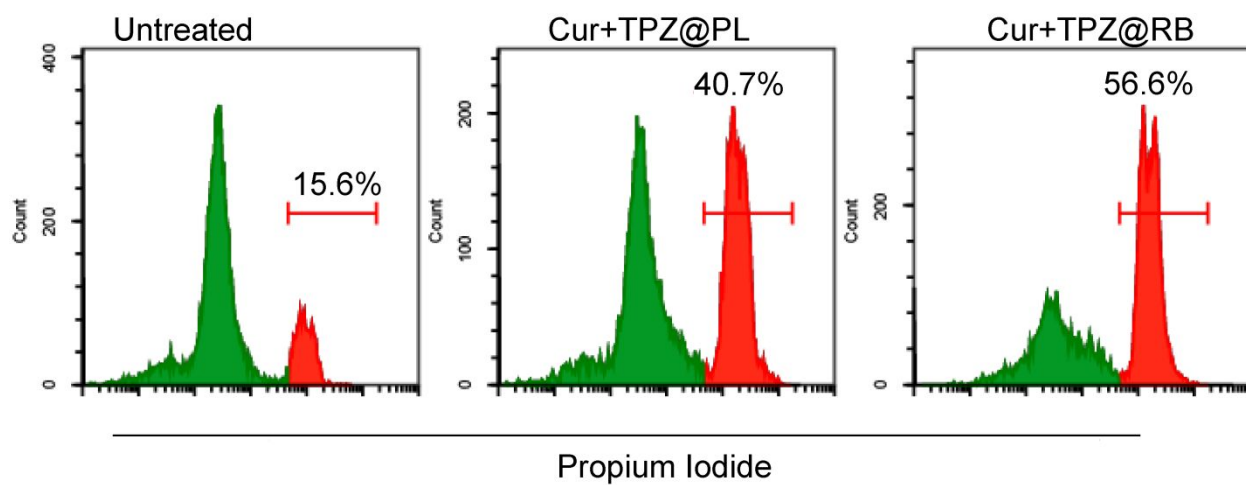

**Figure S13.** Flow cytometric measurement of the PI positive cells in MCF7 spheroids after Cur+TPZ@PL and Cur+TPZ@RB treatment.
